# Supplementary material
Source: Springer Nature journal article supplement (https://www.springermedizin.de/resource/supplementary/12888_2013_1440_MOESM1_ESM.pdf/9480218)
Supplement: MOESM1 [file 9480218]

## Additional File 1. Attrition Chart

**Step 1:** Patients with schizophrenia-related inpatient admission during July 1, 2004- December 31, 2007 (date of the first observed inpatient admission defines the "index admission date" and the date of discharge associated with the index admission defines the "index discharge date")

N = 13,572

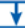

**Step 2:** Excluding patients with schizophrenia-related inpatient admissions (secondary) during the 6-month period prior to the index admission date

N = 12,188

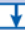

**Step 3:** Patients with at least one outpatient or physician office visit or two or more prescription claims for first- or second-generation antipsychotic medications during the 6-month period prior to the index admission date or 12-month period after the index discharge date

N = 11,434

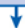

**Step 4:** Excluding patients with at least 1 primary diagnosis claim (i.e., inpatient, outpatient, physician office, ED, long-term care) for bipolar or schizoaffective disorder, or  $\geq 2$  primary diagnosis claims for unipolar disorder during 12-month period after the index discharge date

N = 8,636 (after excluding schizoaffective disorder diagnosed patients)

N = 7,840 (after excluding bipolar disorder diagnosed patients)

N = 7,363 (after excluding unipolar disorder diagnosed patients)

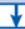

**Step 5:** Patients with continuous Medicaid enrollment (along with drug coverage) during the 6-month period before the index admission date, during the index inpatient admission, and during 12-month period after the index discharge date

N = 3,101

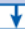

**Step 6:** Excluding patients aged 18 years or younger at index admission date and patients aged 65 years or older at the follow-up end date (follow-up end date = index discharge date + 364 days)

N = 2,894

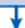

**Step 7:** Excluding patients with dual eligibility (i.e., Medicaid and Medicare)

N = 2,564

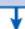

**Step 8:** Excluding patients without mental health coverage

N = 2,541
